# Supplementary material
Source: PubMed Central journal article supplement (PMC8455089)
Supplement: NIHMS895889-supplement-2.pdf [file NIHMS895889-supplement-2.pdf]

Figure S1

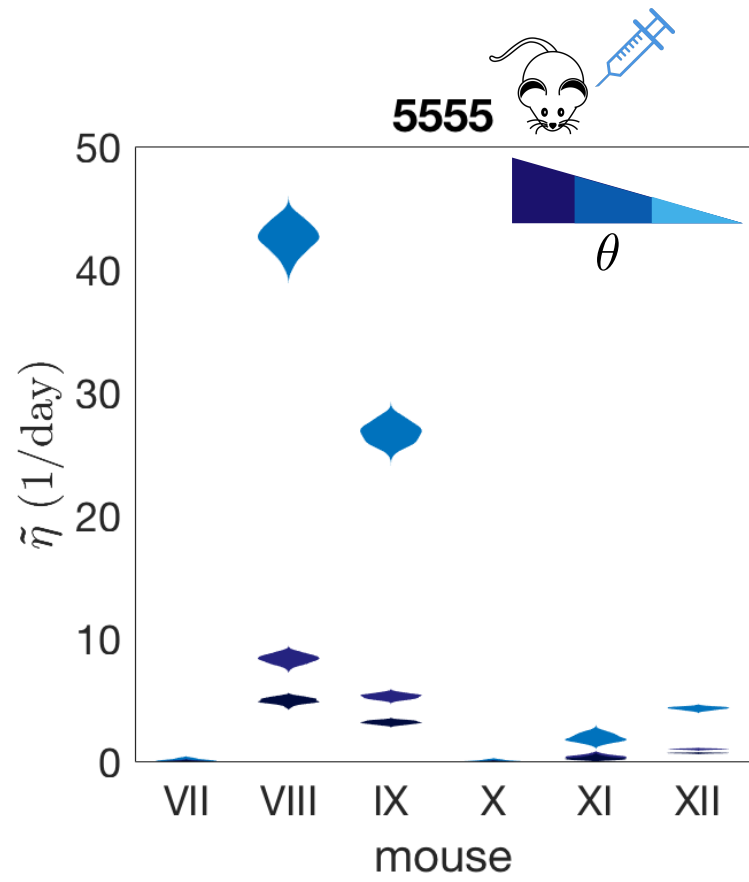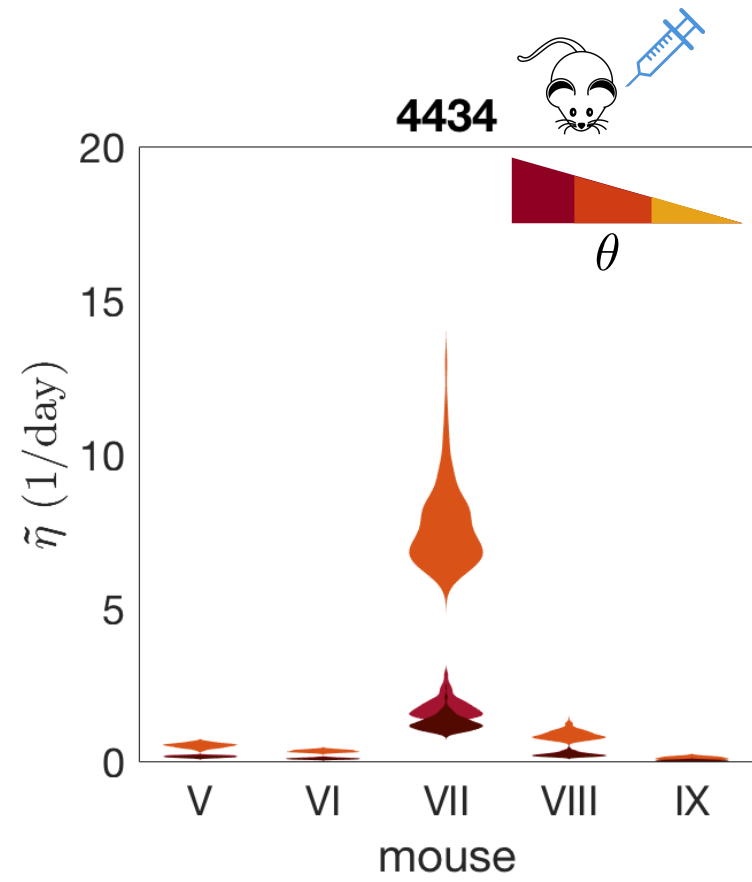

Figure S2

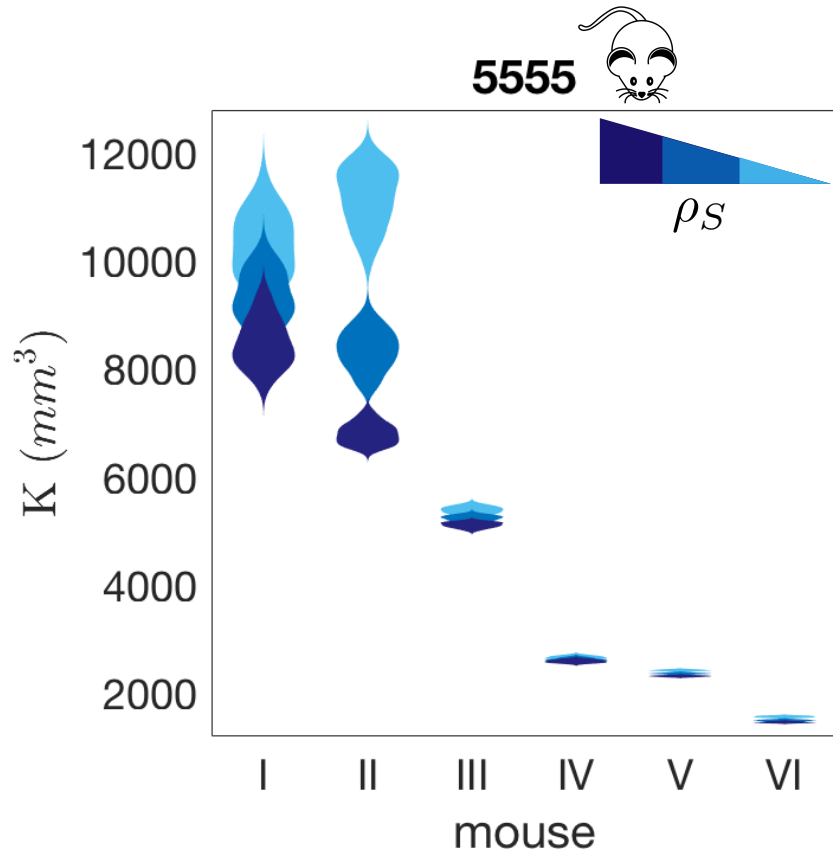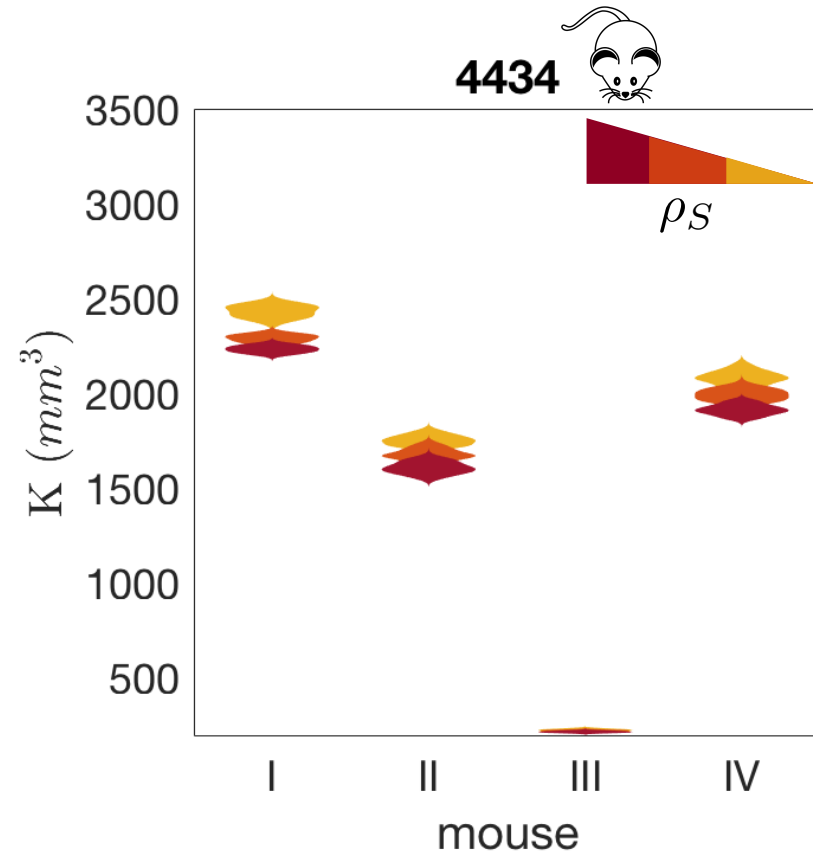

Figure S3

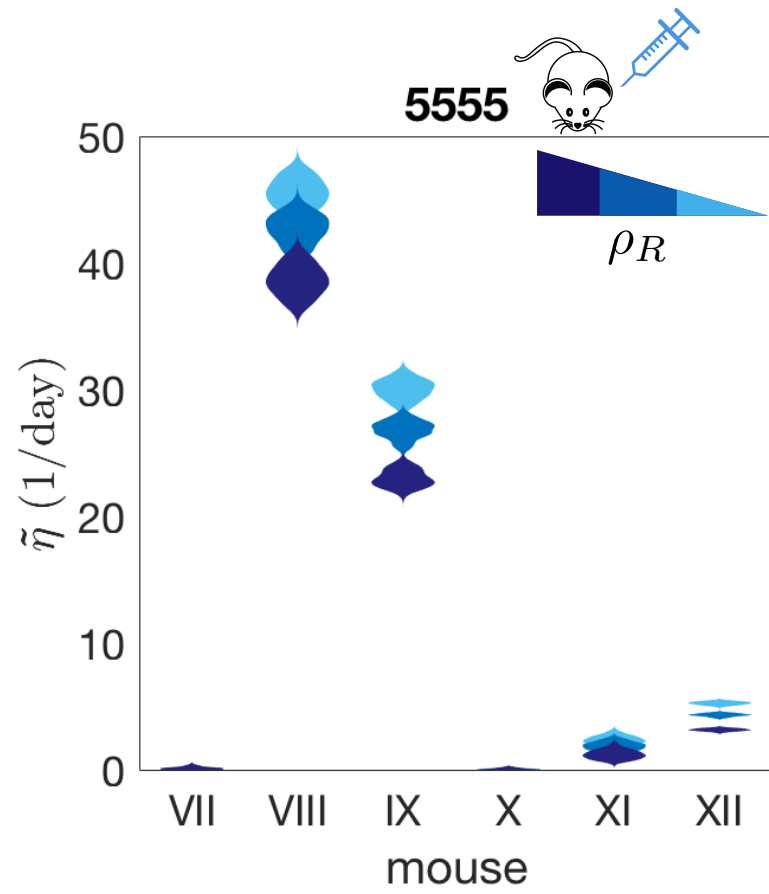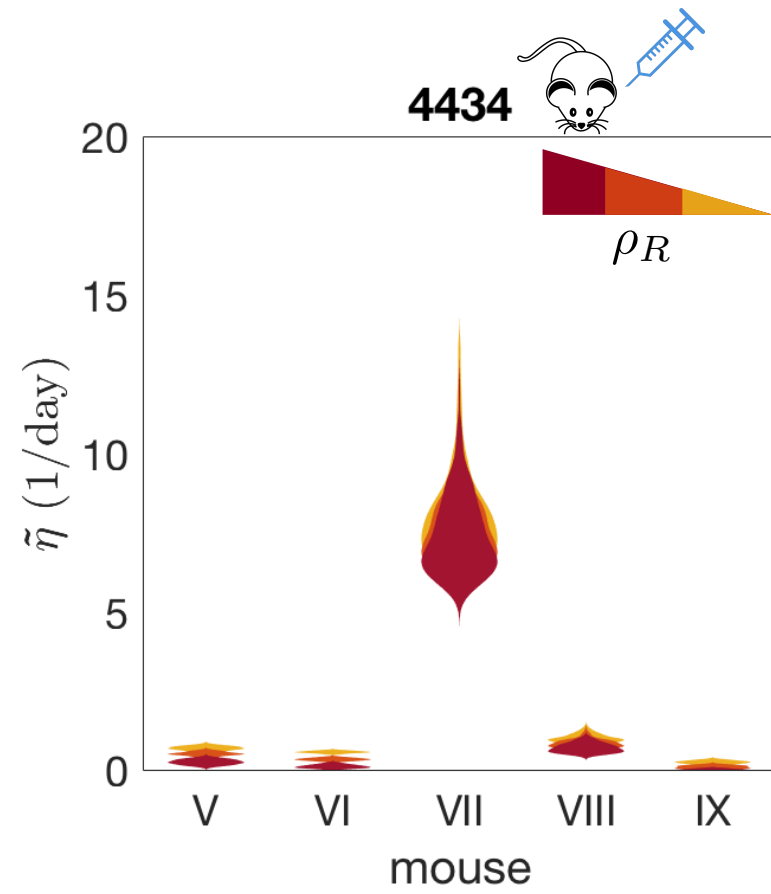

Figure S4

4434 mouse VII

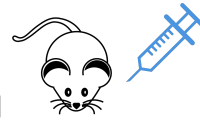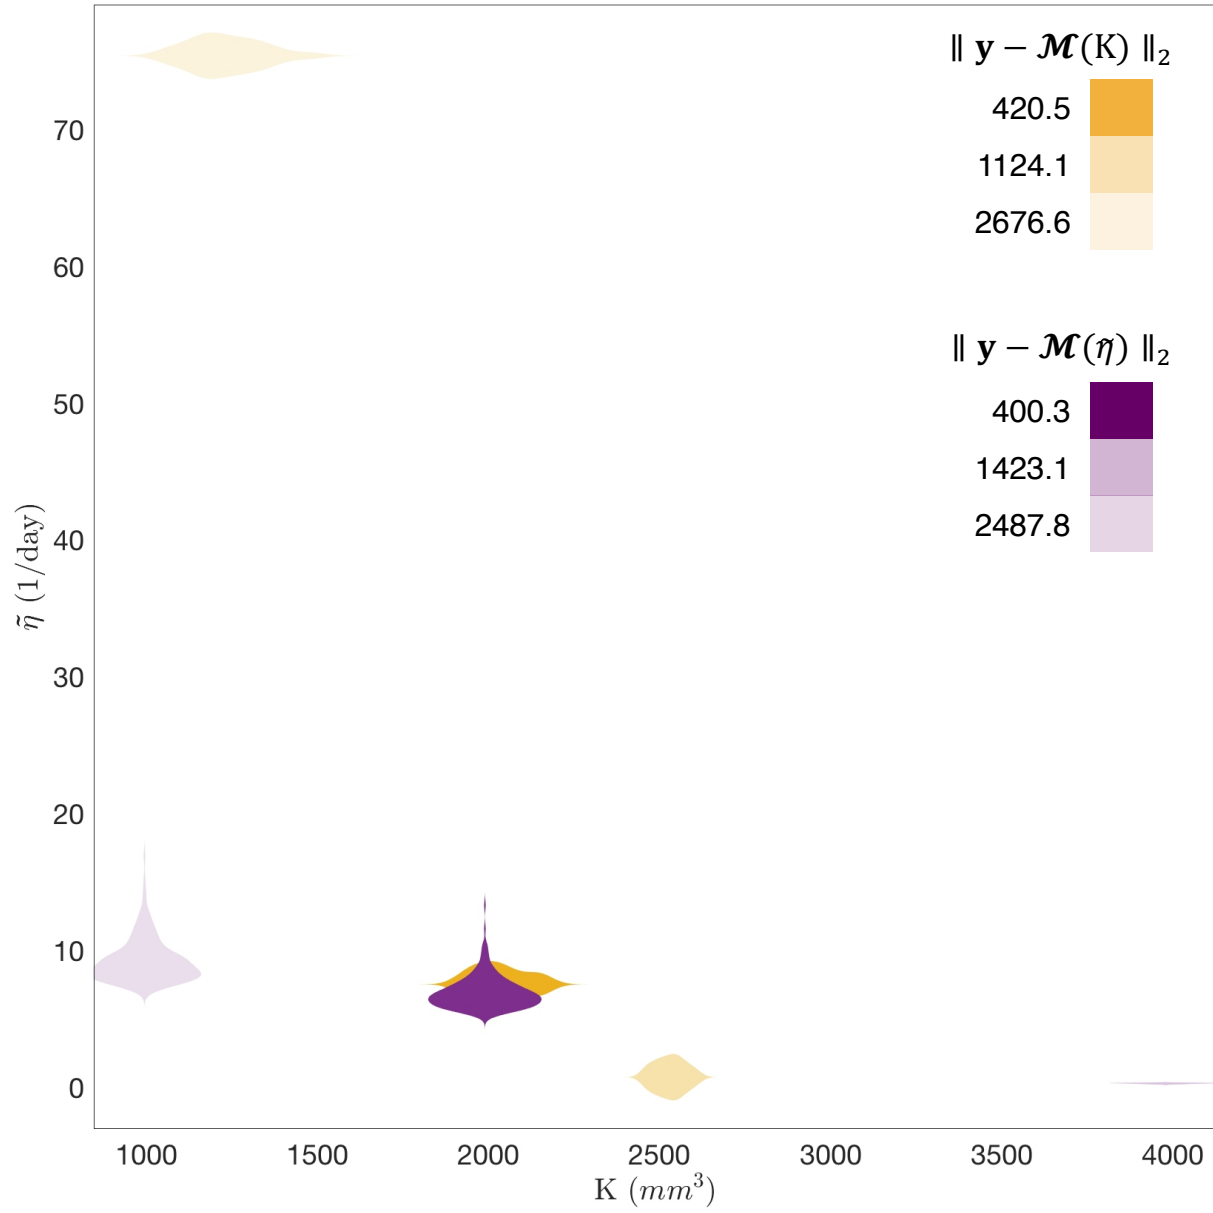

Figure S5

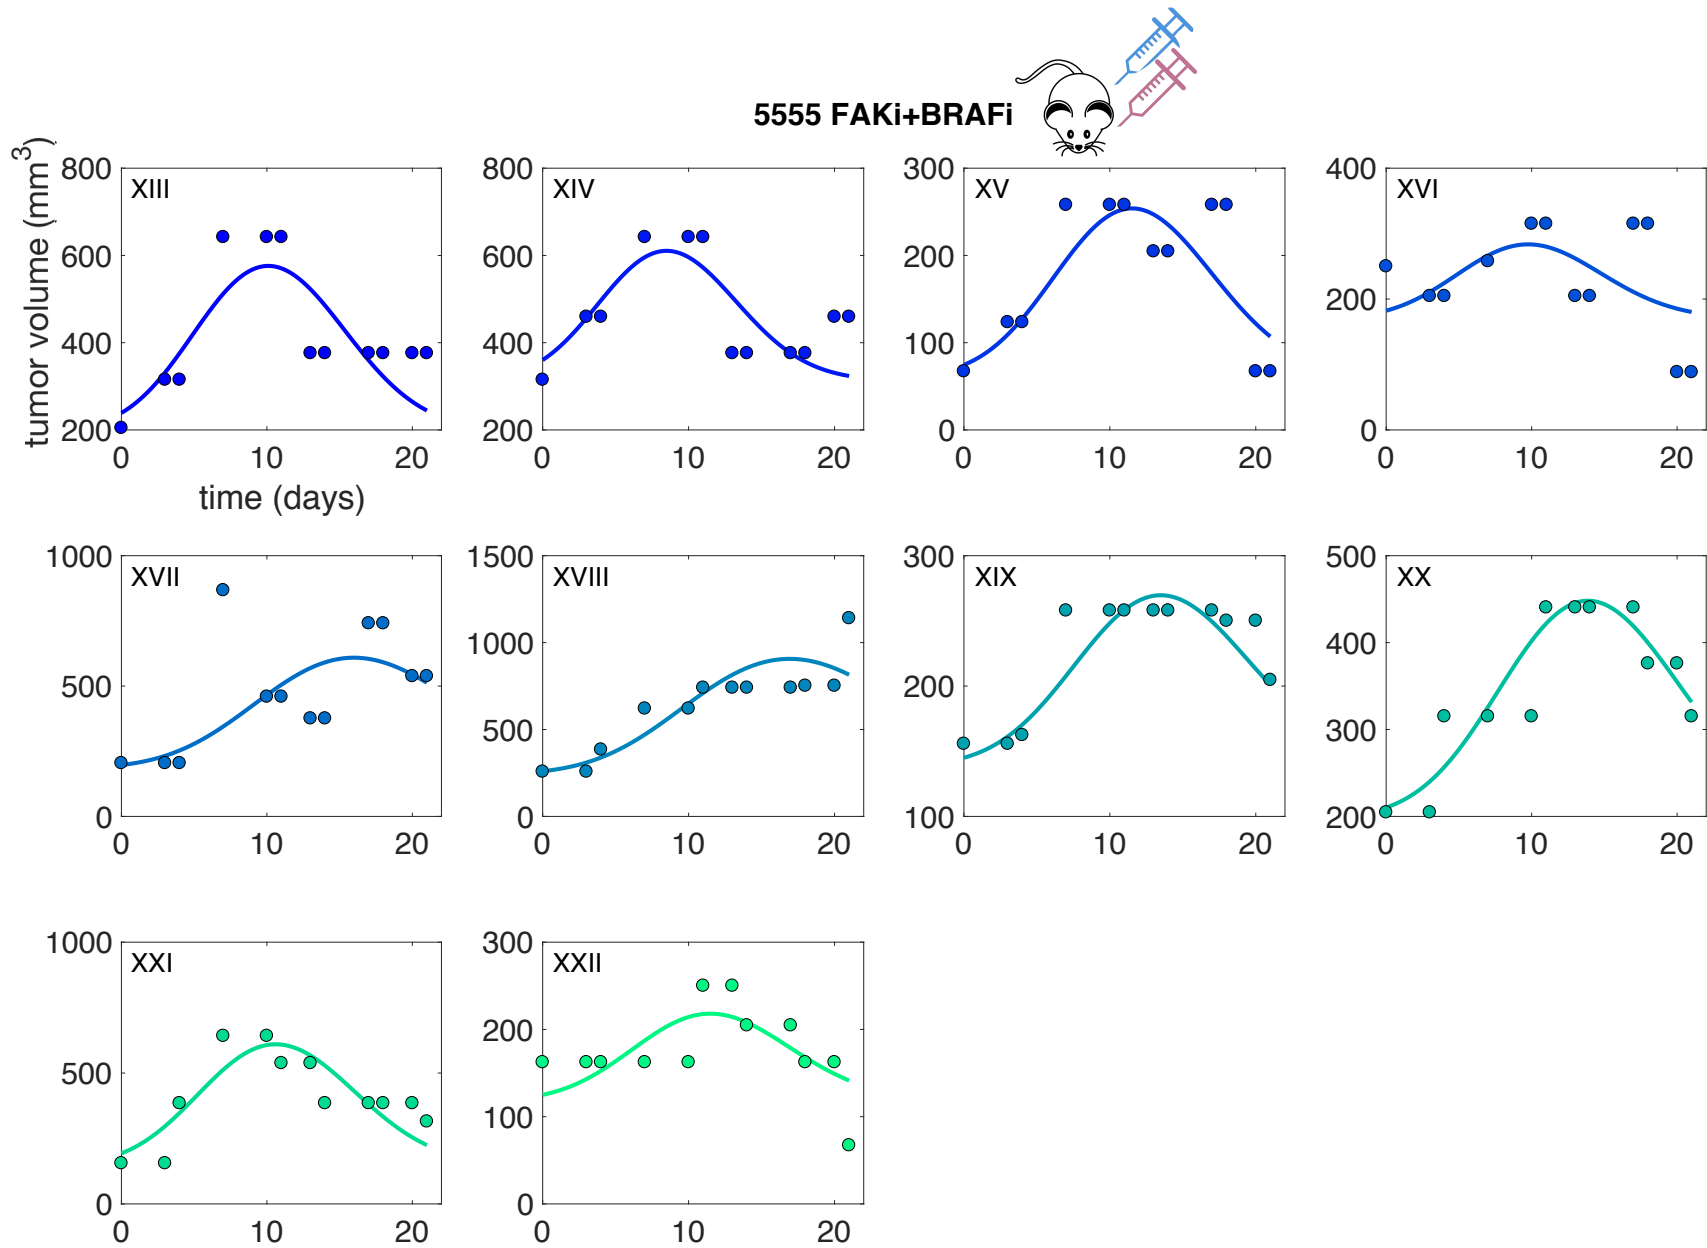

Figure S6

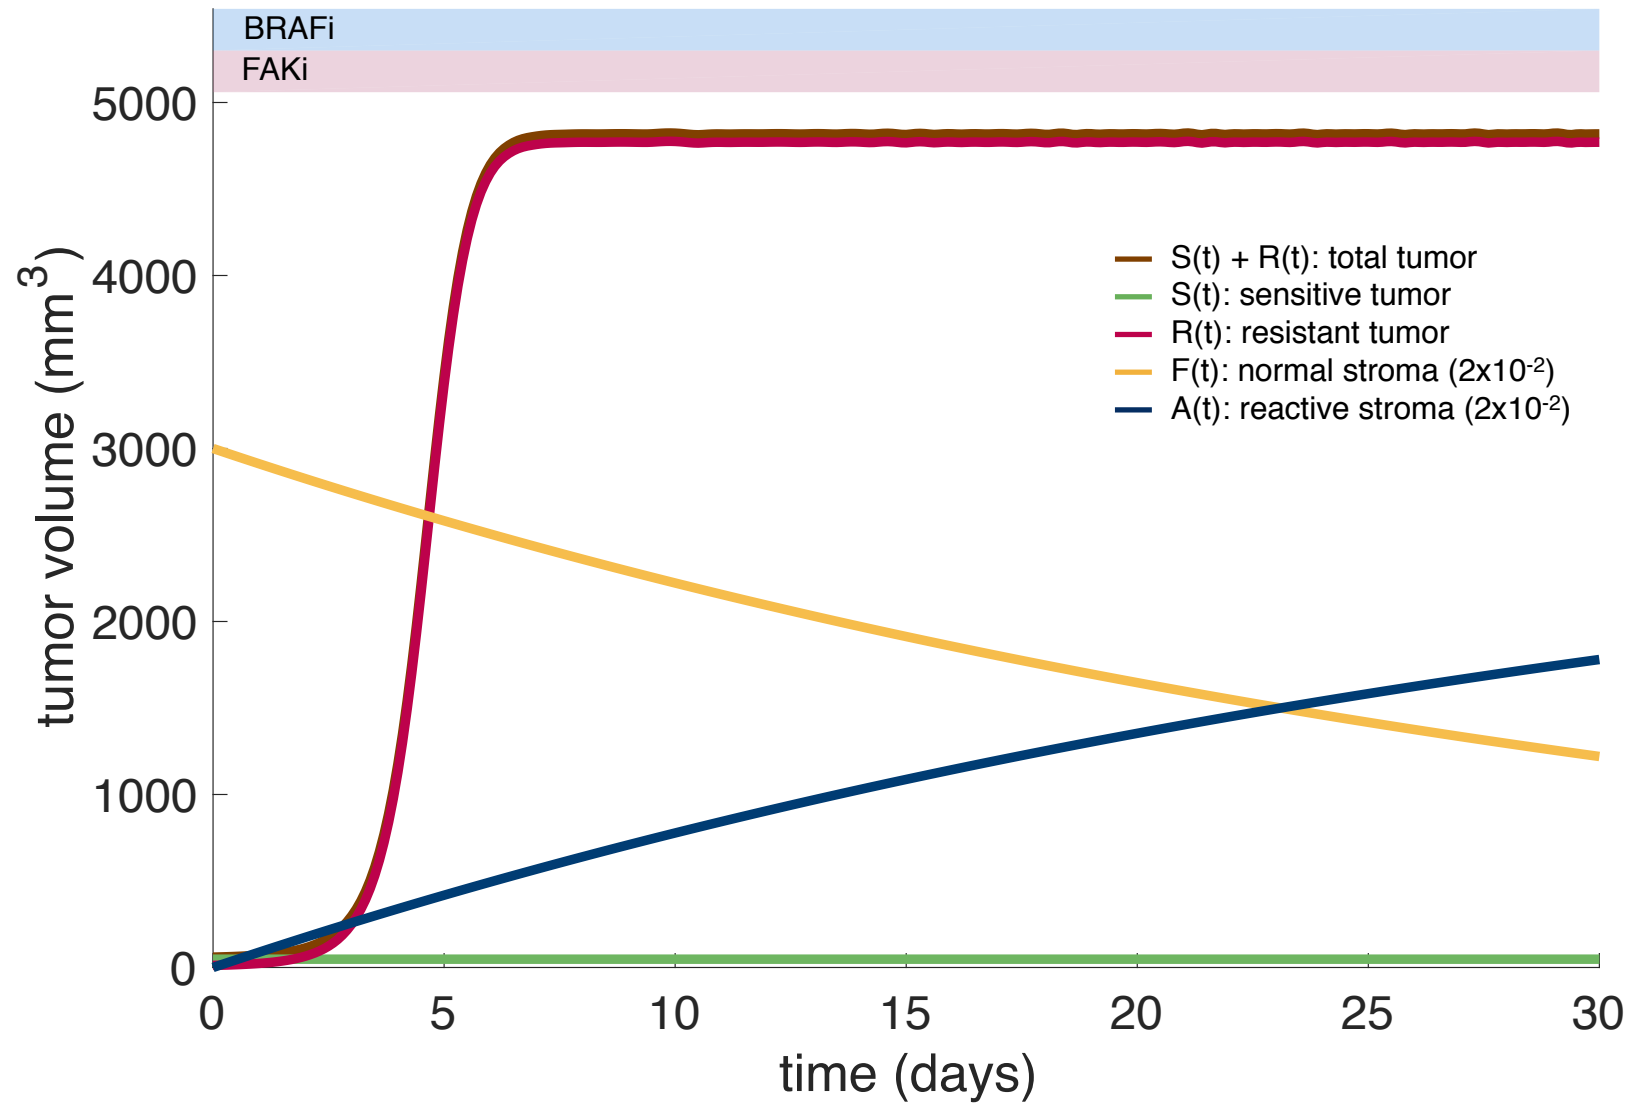

Figure S7

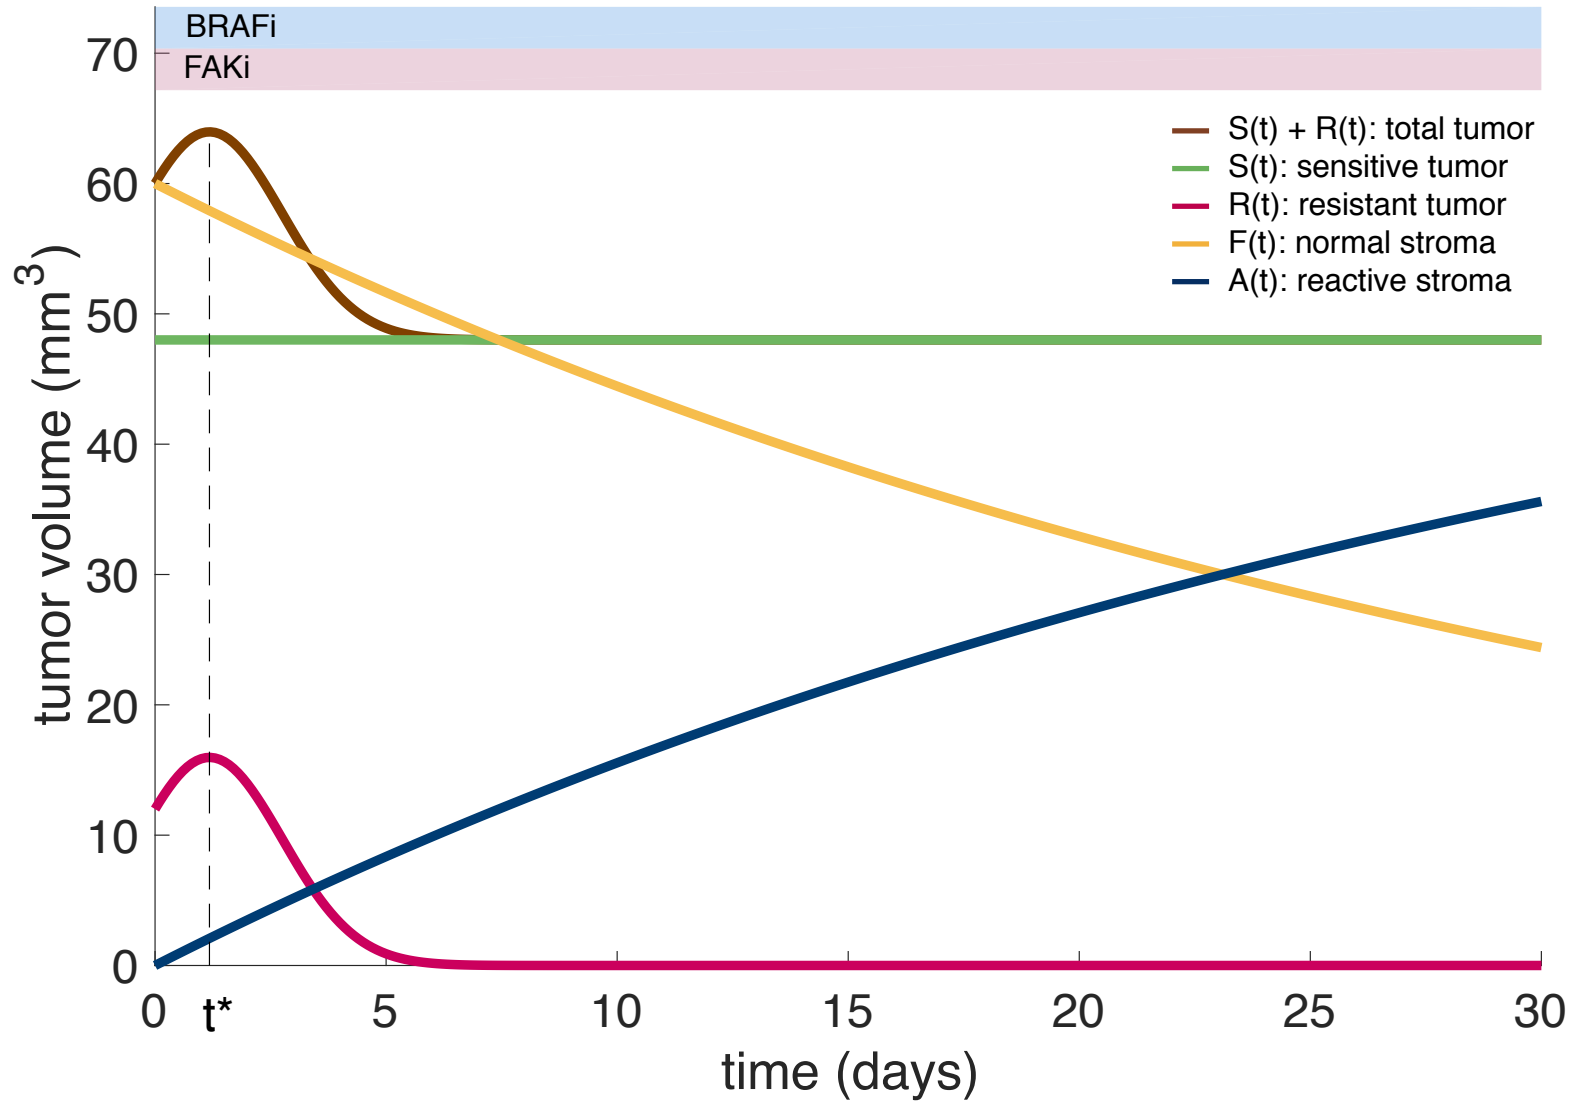

## Supplemental Figure Legends

### Figure S1.

Posterior distribution for  $\tilde{\eta}$  as  $\theta$  is varied, and average  $\rho_R$  value from previous estimate (Table 2). The lighter color violin plots correspond to the value used in the estimates reported in Figure 3C ( $\theta = 0.03$  1/day). The intermediate and darker colored violin plots are obtained with  $\theta = 0.165$  1/day and  $\theta = 0.3$  1/day, respectively.

### Figure S2.

Posterior distribution for  $K$  as  $\rho_S$  is varied within the range of estimates obtained with fit to *in vitro* data of corresponding cell line. The lighter (darker) colored violin plots are obtained with  $\rho_S$  value corresponding to the lower (upper) bound of the range reported in Table 2. The intermediate color violin plots correspond to the average  $\rho_S$  value, and correspond to those reported in Figure 3B.

### Figure S3.

Posterior distribution for  $\tilde{\eta}$  as  $\rho_R$  is varied within the range of estimates obtained with fit to *in vitro* data of corresponding cell line. The lighter (darker) colored violin plots are obtained with  $\rho_R$  value corresponding to the lower (upper) bound of the range reported in Table 2. The intermediate color violin plots correspond to the average  $\rho_R$  value, and correspond to those reported in Figure 3C.

### Figure S4.

Posterior distribution for  $\tilde{\eta}$  as  $K$  is varied (purple) and  $K$  as  $\tilde{\eta}$  is varied (yellow). Mouse VII, cell line 4434, treated with BRAFi. Purple violin plots show probability density functions (x axis) of  $\tilde{\eta}$  estimates (y axis) for a given value of  $K$ . Yellow violin plots show probability density functions (y axis) of  $K$  estimates (x axis) for a given value of  $\tilde{\eta}$ . The intensity of the color of each violin plot is proportional to the goodness of the fit (norm-2 distance between data and fit).  $\theta = 0.03$  1/day.  $\rho_R$  from previous estimates (Table 2).

### Figure S5.

*In vivo* data and fit for 5555 mice XIII through XXII, treated with PLX4720 (BRAFi) and PF562271 (FAKi). Note different y axis scales. Data from [13].



**Figure S6.**

Example of case 1. Model parameterized on mouse IX of cell line 5555.  $\rho_S = 0.66325$  1/day,  $\rho_R = 0.49543$  1/day,  $K = 4818.62$  mm<sup>3</sup>,  $\tilde{\eta} = 26.876$  1/day,  $\tilde{\alpha} = 14.4$  1/day,  $\theta = 0.03$  1/day,  $S_0 = 48$  mm<sup>3</sup>,  $R_0 = 12$  mm<sup>3</sup>,  $F_0 = 60$  mm<sup>3</sup>,  $A_0 = 0$  mm<sup>3</sup>. The tumour burden (brown) is monotonically increasing under treatment combination of BRAFi and FAKi.

**Figure S7.**

Example of case 2. Model parameterized on mouse VII of cell line 5555.  $\rho_S = 0.66325$  1/day,  $\rho_R = 0.49543$  1/day,  $K = 4818.62$  mm<sup>3</sup>,  $\tilde{\eta} = 0.1257$  1/day,  $\tilde{\alpha} = 14.4$  1/day,  $\theta = 0.03$  1/day,  $S_0 = 48$  mm<sup>3</sup>,  $R_0 = 12$  mm<sup>3</sup>,  $F_0 = 60$  mm<sup>3</sup>,  $A_0 = 0$  mm<sup>3</sup>. Under treatment combination of BRAFi and FAKi, the tumor burden (brown) is monotonically decreasing after time  $t^* = 1.1771$  day.
